# Supplementary material for: Mining Biosynthetic Gene Clusters of Pseudomonas vancouverensis Utilizing Whole Genome Sequencing
Source: MDPI journal article supplement (doi:10.3390/microorganisms12030548), 2024-03-09
Supplement: s1 [file s1]

**Table S1:** Five global protein families used in phylogenetic analysis.

| S<br>N | Protein<br>family | Type         | BRIC ID                            |                                |                                |                                |                                |                                |                                |                                |                                |                                |                               |
|--------|-------------------|--------------|------------------------------------|--------------------------------|--------------------------------|--------------------------------|--------------------------------|--------------------------------|--------------------------------|--------------------------------|--------------------------------|--------------------------------|-------------------------------|
|        |                   |              | fig 11<br>24983.<br>3.peg.<br>615  | fig 11361<br>38.3.peg.<br>4231 | fig 11797<br>78.3.peg.2<br>229 | fig 12070<br>75.3.peg.5<br>03  | fig 12181<br>69.3.peg.5<br>062 | fig 12294<br>86.3.peg.3<br>270 | fig 13305<br>31.3.peg.4<br>361 | fig 20592<br>2.5.peg.56<br>5   | fig 22066<br>4.5.peg.61<br>7   | fig 23760<br>9.3.peg.46<br>85  | fig 95300.<br>39.peg.49<br>83 |
| 1      | PGF_10<br>357928  | Prot<br>eins | fig 11<br>24983.<br>3.peg.<br>615  | fig 11361<br>38.3.peg.<br>4231 | fig 11797<br>78.3.peg.2<br>229 | fig 12070<br>75.3.peg.5<br>03  | fig 12181<br>69.3.peg.5<br>062 | fig 12294<br>86.3.peg.3<br>270 | fig 13305<br>31.3.peg.4<br>361 | fig 20592<br>2.5.peg.56<br>5   | fig 22066<br>4.5.peg.61<br>7   | fig 23760<br>9.3.peg.46<br>85  | fig 95300.<br>39.peg.49<br>83 |
|        | PGF_10<br>357928  | Cod<br>ons   | fig 12<br>07075.<br>3.peg.<br>503  | fig 12181<br>69.3.peg.<br>5062 | fig 11361<br>38.3.peg.4<br>231 | fig 11797<br>78.3.peg.2<br>229 | fig 12294<br>86.3.peg.3<br>270 | fig 13305<br>31.3.peg.4<br>361 | fig 22066<br>4.5.peg.61<br>7   | fig 23760<br>9.3.peg.46<br>85  | fig 11249<br>83.3.peg.6<br>15  | fig 20592<br>2.5.peg.56<br>5   | fig 95300.<br>39.peg.49<br>83 |
| 2      | PGF_00<br>413208  | Prot<br>eins | fig 11<br>24983.<br>3.peg.<br>1129 | fig 11361<br>38.3.peg.<br>2780 | fig 11797<br>78.3.peg.9<br>06  | fig 12070<br>75.3.peg.4<br>515 | fig 12181<br>69.3.peg.5<br>780 | fig 12294<br>86.3.peg.2<br>395 | fig 13305<br>31.3.peg.4<br>20  | fig 20592<br>2.5.peg.10<br>39  | fig 22066<br>4.5.peg.11<br>25  | fig 23760<br>9.3.peg.41<br>17  | fig 95300.<br>39.peg.20<br>06 |
|        | PGF_00<br>413208  | Cod<br>ons   | fig 20<br>5922.5<br>.peg.1<br>039  | fig 13305<br>31.3.peg.<br>420  | fig 11361<br>38.3.peg.2<br>780 | fig 23760<br>9.3.peg.41<br>17  | fig 12181<br>69.3.peg.5<br>780 | fig 22066<br>4.5.peg.11<br>25  | fig 11249<br>83.3.peg.1<br>129 | fig 12070<br>75.3.peg.4<br>515 | fig 11797<br>78.3.peg.9<br>06  | fig 12294<br>86.3.peg.2<br>395 | fig 95300.<br>39.peg.20<br>06 |
| 3      | PGF_03<br>050893  | Prot<br>eins | fig 11<br>24983.<br>3.peg.<br>3348 | fig 11361<br>38.3.peg.<br>1592 | fig 11797<br>78.3.peg.3<br>707 | fig 12070<br>75.3.peg.2<br>921 | fig 12181<br>69.3.peg.7<br>259 | fig 12294<br>86.3.peg.5<br>358 | fig 13305<br>31.3.peg.2<br>019 | fig 20592<br>2.5.peg.22<br>30  | fig 22066<br>4.5.peg.33<br>53  | fig 23760<br>9.3.peg.15<br>36  | fig 95300.<br>39.peg.46<br>72 |
|        | PGF_03<br>050893  | Cod<br>ons   | fig 11<br>36138.<br>3.peg.<br>1592 | fig 20592<br>2.5.peg.2<br>230  | fig 12070<br>75.3.peg.2<br>921 | fig 12294<br>86.3.peg.5<br>358 | fig 22066<br>4.5.peg.33<br>53  | fig 13305<br>31.3.peg.2<br>019 | fig 23760<br>9.3.peg.15<br>36  | fig 12181<br>69.3.peg.7<br>259 | fig 11249<br>83.3.peg.3<br>348 | fig 11797<br>78.3.peg.3<br>707 | fig 95300.<br>39.peg.46<br>72 |
| 4      | PGF_03<br>790040  | Prot<br>eins | fig 11<br>24983.<br>3.peg.<br>1102 | fig 11361<br>38.3.peg.<br>2760 | fig 11797<br>78.3.peg.5<br>97  | fig 12070<br>75.3.peg.9<br>83  | fig 12181<br>69.3.peg.4<br>071 | fig 12294<br>86.3.peg.2<br>83  | fig 13305<br>31.3.peg.4<br>817 | fig 20592<br>2.5.peg.10<br>12  | fig 22066<br>4.5.peg.10<br>99  | fig 23760<br>9.3.peg.10<br>83  | fig 95300.<br>39.peg.25<br>3  |
|        | PGF_03<br>790040  | Cod<br>ons   | fig 20<br>5922.5<br>.peg.1<br>012  | fig 12070<br>75.3.peg.<br>983  | fig 12181<br>69.3.peg.4<br>071 | fig 13305<br>31.3.peg.4<br>817 | fig 11249<br>83.3.peg.1<br>102 | fig 11797<br>78.3.peg.5<br>97  | fig 23760<br>9.3.peg.10<br>83  | fig 22066<br>4.5.peg.10<br>99  | fig 11361<br>38.3.peg.2<br>760 | fig 12294<br>86.3.peg.2<br>83  | fig 95300.<br>39.peg.25<br>3  |
| 5      | PGF_00<br>026362  | Prot<br>eins | fig 11<br>24983.<br>3.peg.<br>615  | fig 11361<br>38.3.peg.<br>4231 | fig 11797<br>78.3.peg.1<br>229 | fig 12070<br>75.3.peg.5<br>03  | fig 12181<br>69.3.peg.2<br>062 | fig 12294<br>86.3.peg.3<br>270 | fig 13305<br>31.3.peg.2<br>361 | fig 20592<br>2.5.peg.53        | fig 22066<br>4.5.peg.59        | fig 23760<br>9.3.peg.49        | fig 95300.<br>39.peg.14       |

|  |                  |            |                                    |                                |                               |                                |                                |                                |                               |                               |                                |                               |                               |
|--|------------------|------------|------------------------------------|--------------------------------|-------------------------------|--------------------------------|--------------------------------|--------------------------------|-------------------------------|-------------------------------|--------------------------------|-------------------------------|-------------------------------|
|  |                  |            | 3.peg.<br>5828                     | 3408                           | 75                            | 218                            | 780                            | 788                            | 399                           | 42                            | 59                             | 15                            | 71                            |
|  | PGF_00<br>026362 | Cod<br>ons | fig 11<br>24983.<br>3.peg.<br>5828 | fig 11361<br>38.3.peg.<br>3408 | fig 23760<br>9.3.peg.49<br>15 | fig 12294<br>86.3.peg.3<br>788 | fig 12070<br>75.3.peg.5<br>218 | fig 13305<br>31.3.peg.2<br>399 | fig 20592<br>2.5.peg.53<br>42 | fig 22066<br>4.5.peg.59<br>59 | fig 12181<br>69.3.peg.2<br>780 | fig 11797<br>78.3.peg.1<br>75 | fig 95300.<br>39.peg.14<br>71 |

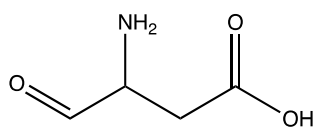

Cluster 2: 3-amino-4-oxobutanoic acid (NRPs)

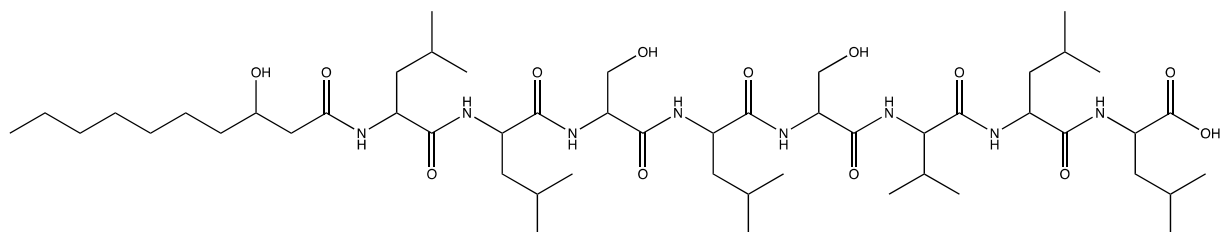

(3-hydroxydecanoyl)leucylleucylserylleucylserylvalylleucylleucine

(3-hydroxydecanoyl)leucylleucylserylleucylserylvalylleucylleucine

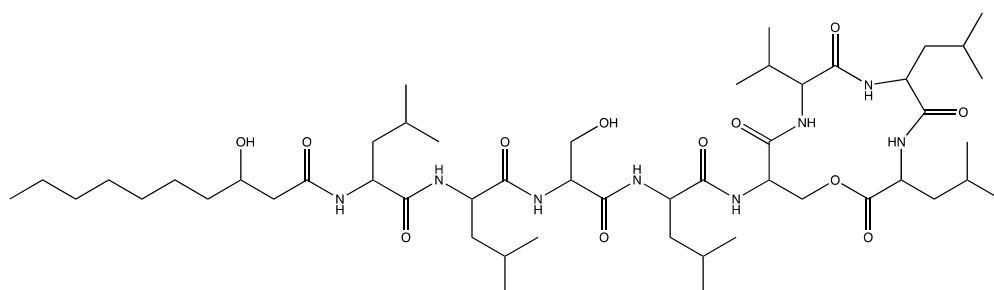

*N*-(1-((1-((1-((1-((3,6-diisobutyl-9-isopropyl-2,5,8,11-tetraoxo-1-oxa-4,7,10-triazacyclotridecan-12-yl)amino)-4-methyl-1-oxopentan-2-yl)amino)-3-hydroxy-1-oxopropan-2-yl)amino)-4-methyl-1-oxopentan-2-yl)amino)-4-methyl-1-oxopentan-2-yl)-3-hydroxydecanamide

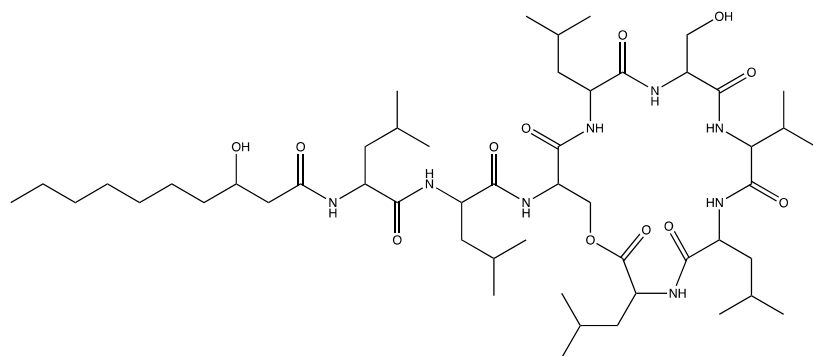

3-hydroxy-*N*-(1-((1-((12-(hydroxymethyl)-3,6,15-triisobutyl-9-isopropyl-2,5,8,11,14,17-hexaoxo-1-oxa-4,7,10,13,16-pentaazacyclonadecan-18-yl)amino)-4-methyl-1-oxopentan-2-yl)amino)-4-methyl-1-oxopentan-2-yl)decanamide

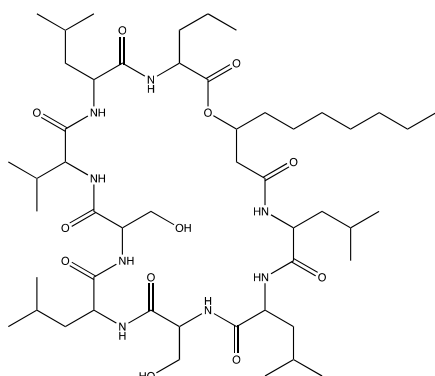

28-heptyl-12,18-bis(hydroxymethyl)-3,6,15,21,24-pentaisobutyl-9-isopropyl-1-oxa-4,7,10,13,16,19,22,25-octazacyclooctacosane-2,5,8,11,14,17,20,23,26-nonaone

### Cluster 3: NRPS

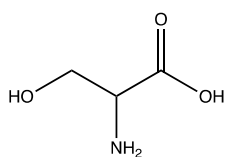

### Cluster 4 and 12: Serine (NRPs)

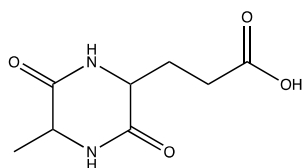

3-(5-methyl-3,6-dioxopiperazin-2-yl)propanoic acid

### Cluster 7: Cyclodipeptide (XYP family)

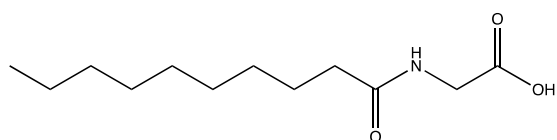

### Cluster 8: Decanoylglycine (NRPS)

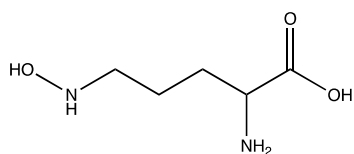

2-amino-5-(hydroxyamino)pentanoic acid

### Cluster 9: NRPS

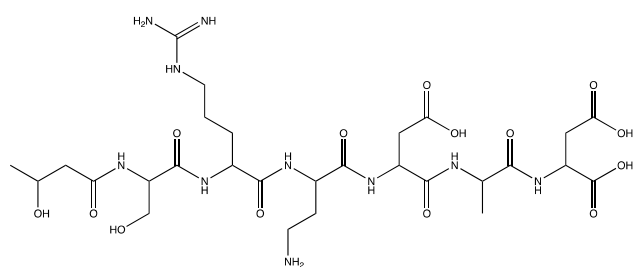

(4-amino-2-(5-guanidino-2-(3-hydroxy-2-(3-hydroxybutanamido)propanamido)pentanamido)butanoyl)aspartylalanylaspartic acid

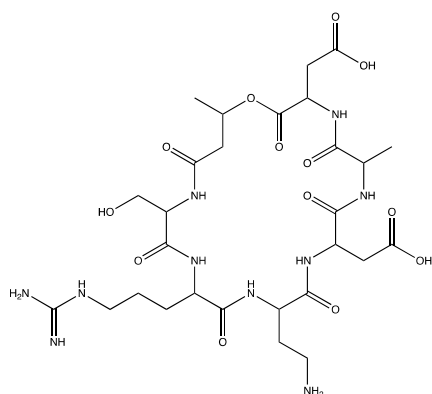

2,2'-(12-(2-aminoethyl)-15-(3-guanidinopropyl)-18-(hydroxymethyl)-6,22-dimethyl-2,5,8,11,14,17,20-hepta-oxo-1-oxa-4,7,10,13,16,19-hexaazacyclodocosane-3,9-diyl)diacetic acid

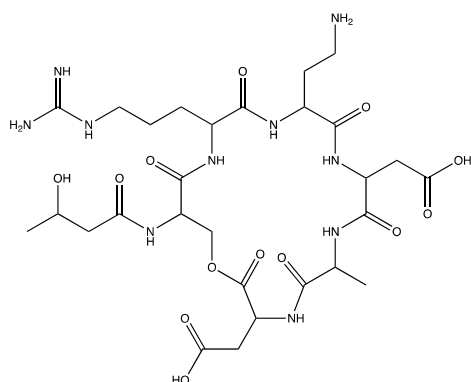

2,2'-(12-(2-aminoethyl)-15-(3-guanidinopropyl)-18-(3-hydroxybutanamido)-6-methyl-2,5,8,11,14,17-hexa-oxo-1-oxa-4,7,10,13,16-pentaazacyclononadecane-3,9-diyl)diacetic acid

#### Cluster 10: NRPs

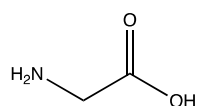

#### Cluster 11: Glycine (NRPS)

**Figure S1:** IUPAC name of the predicted secondary metabolites produced by *P. vancouverensis* using PRISM 4 prediction tool.
